# Supplementary material for: Comparative Analysis of Traditional Oriental Herbal Fruits as Potential Sources of Polyphenols and Minerals for Nutritional Supplements
Source: MDPI journal article supplement (doi:10.3390/molecules28062682), 2023-03-16
Supplement: s1 [file s1]

Supplementary material

**Comparative analysis of traditional oriental  
herbal fruits as potential sources of  
polyphenols and minerals for nutritional  
supplements**

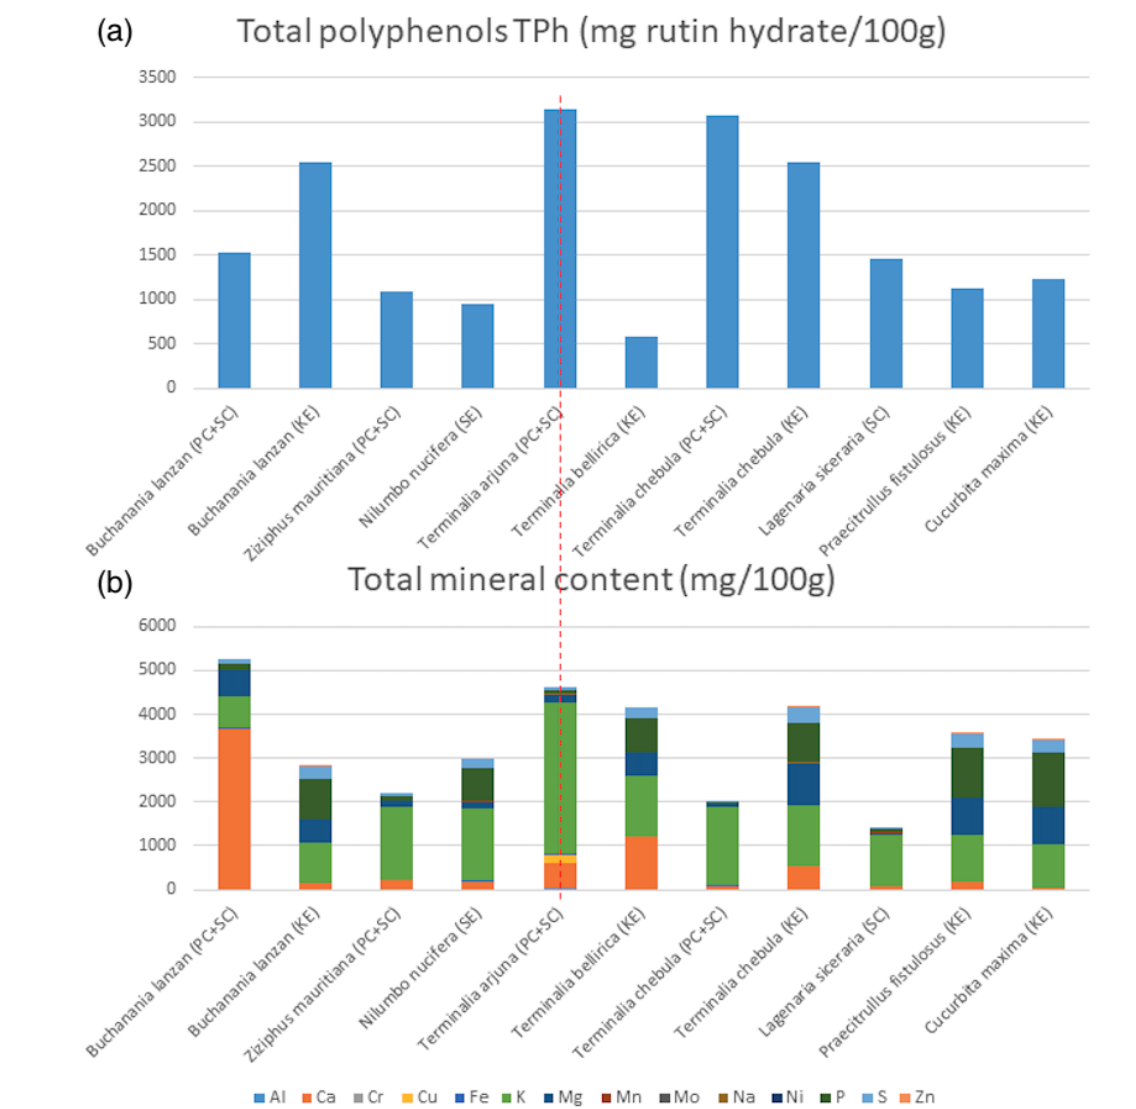

Figure S1. (a) Total Polyphenols (TPh). (b) Total mineral content comparison.
